# Supplementary material for: Ultrafine Ru nanoclusters supported on N/S doped macroporous carbon spheres for efficient hydrogen evolution reaction
Source: Royal Society of Chemistry journal article supplement (doi:10.1039/d1na00424g), 2021-01-01
Supplement: d1na00424g1.pdf [file d1na00424g1.pdf]

### **Supplementary information**

Yijie Wang, Wenjie Luo, Haojie Li, and Chuanwei Cheng

Shanghai Key Laboratory of Special Artificial Microstructure Materials and Technology, School of Physics Science and Engineering, Tongji University, Shanghai 200092, P.R. China. E-mail: cwcheng@tongji.edu.cn

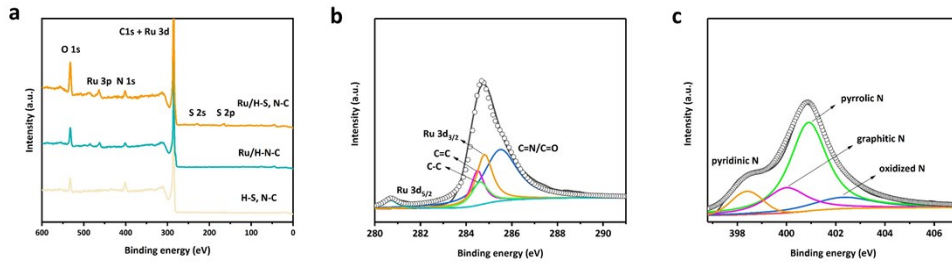

Fig S1 (a) XPS survey of Ru/H-S, N-C, Ru/H-N-C, and H-S, N-C; (b) C 1s and Ru 3d spectra; (c) N 1s spectra

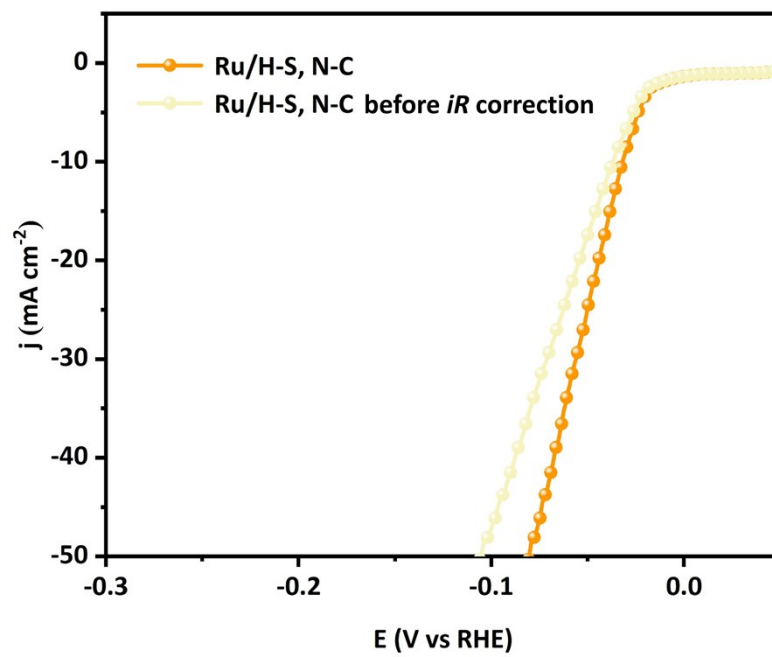

Fig S2 The comparison of LSV curves before and after  $iR$  correction of Ru/H-S, N-C

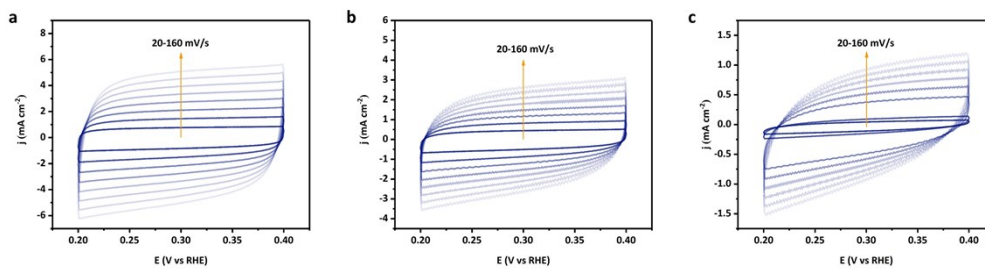

Fig S3 CV curves between 0.30 and 0.40 V of (a) Ru/H-S, N-C, (b) Ru/H-N-C, and (c) H-S, N-C

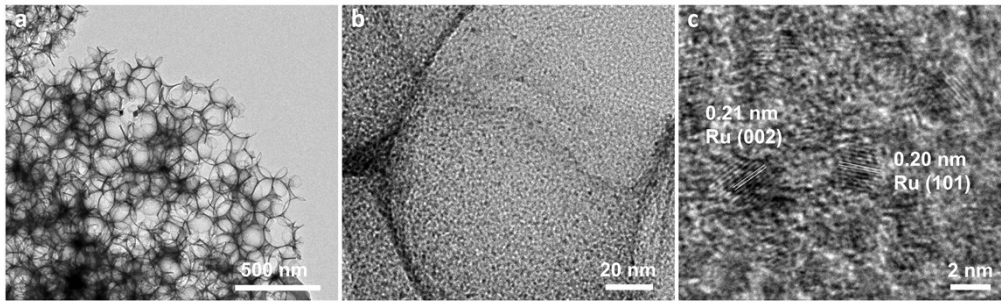

Fig S4 (a) TEM and (b-c) HRTEM images of Ru/H-S, N-C after stability test.

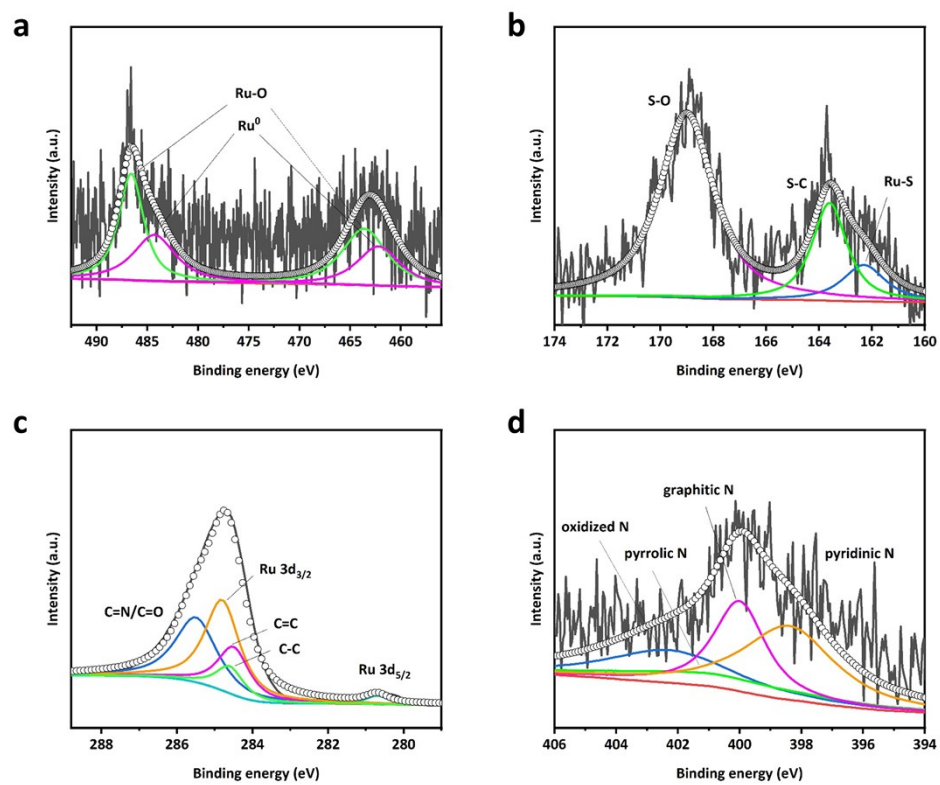

Fig S5 XPS spectra of Ru/H-S, N-C after stability test

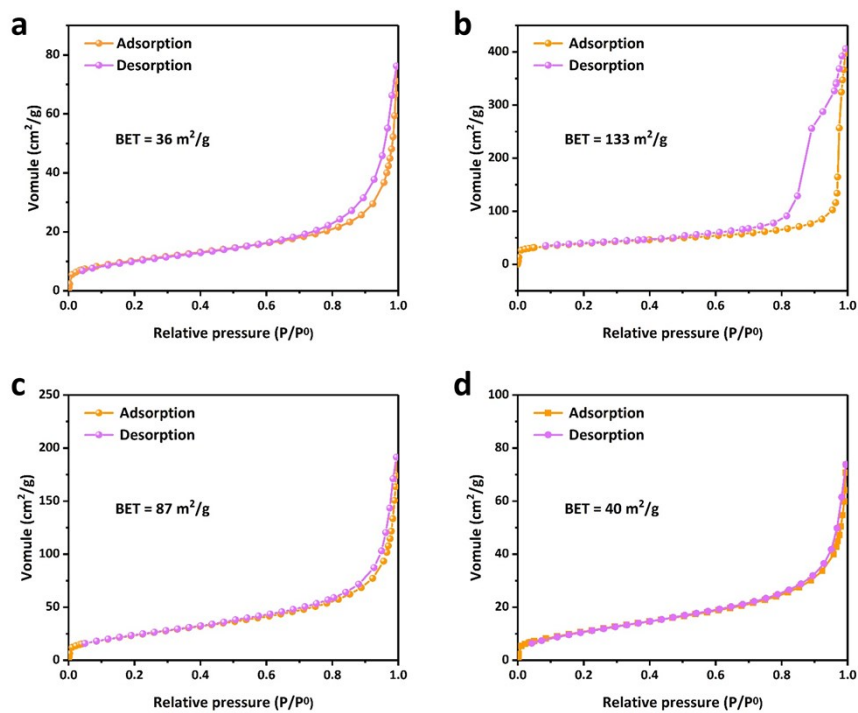

Fig. S6 The N<sub>2</sub> adsorption and desorption measurements (a) Ru-S, N-C and Ru/H-S, N-C with different diameters of SiO<sub>2</sub> as templates (b) 50 nm, (c) 227 nm, and (d) 380nm

Table S1. Statistic data of yield after each synthesis procedure of Ru/H-S, N-C

| <b>Procedure</b>         | <b>Weight (mg)</b> | <b>Yield (%)</b> |
|--------------------------|--------------------|------------------|
| Weighing                 | 127.06             | -                |
| Self-assembly & Oil bath | 107.02             | 84.23            |
| Pyrolysis                | 78.53              | 73.38            |
| HF etching               | 6.71               | 8.54             |



Table S2. Element composition of Ru/H-S, N-C and Ru/H-N-C on the basis of TEM-EDS

| <b>Sample</b> | <b>Element</b> | <b>Wt%</b> |
|---------------|----------------|------------|
| Ru/H-S, N-C   | Ru             | 16.76      |
|               | S              | 2.29       |
|               | N              | 1.12       |
|               | C              | 79.83      |
| Ru/H-N-C      | Ru             | 13.12      |
|               | N              | 0.43       |
|               | C              | 86.45      |

Table S3. The comparison of HER performance between Ru/H-S, N-C and other Ru-based catalysts

| <b>Catalysts</b>                          | <b>Electrolyte</b> | <b><math>\eta_{10}</math><br/>(mV)</b> | <b>Tafel<br/>slope (mV<br/>dec<sup>-1</sup>)</b> | <b>loading<br/>(mg cm<sup>-2</sup>)</b> | <b>Ref.</b> |
|-------------------------------------------|--------------------|----------------------------------------|--------------------------------------------------|-----------------------------------------|-------------|
| <b>Ru/H-S, N-C</b>                        | 1.0 M KOH          | 32                                     | 24                                               | 0.35                                    | This work   |
| <b>Pt/C</b>                               | 1.0 M KOH          | 40                                     | 42                                               | 0.35                                    | This work   |
| <b>Ru<sup>0</sup>/CeO<sub>2</sub></b>     | 1.0 M KOH          | 47                                     | 41                                               | 0.197                                   | 1           |
| <b>Ru-MoO<sub>2</sub></b>                 | 1.0 M KOH          | 29                                     | 31                                               | 0.285                                   | 2           |
| <b>Cu<sub>2-x</sub>S@Ru</b>               | 1.0 M KOH          | 82                                     | 48                                               | 0.23                                    | 3           |
| <b>NiO/Ru@Ni</b>                          | 1.0 M KOH          | 39                                     | 75                                               | -                                       | 4           |
| <b>RuP<sub>2</sub>@NPC</b>                | 1.0 M KOH          | 52                                     | 69                                               | 1.0                                     | 5           |
| <b>S-4</b>                                | 1.0 M KOH          | 28                                     | 31                                               | 0.275                                   | 6           |
| <b>Ru<sub>2</sub>Ni<sub>2</sub> SNs/C</b> | 1.0 M KOH          | 40                                     | 23.4                                             | 0.1                                     | 7           |
| <b>Ru@SC-CDs 2:10</b>                     | 1.0 M KOH          | 29                                     | 57                                               | 0.42                                    | 8           |
| <b>Ru<sub>2</sub>P@PNC/CC-900</b>         | 1.0 M KOH          | 50                                     | 66                                               | 1.5                                     | 9           |
| <b>Ni@Ni<sub>2</sub>P-Ru HNRs</b>         | 1.0 M KOH          | 41                                     | 31                                               | -                                       | 10          |
| <b>SA-Ru-MoS<sub>2</sub></b>              | 1.0 M KOH          | 76                                     | 21                                               | 0.285                                   | 11          |
| <b>Ru-MoS<sub>2</sub>/CNT</b>             | 1.0 M KOH          | 50                                     | 62                                               | 1.0                                     | 12          |
| <b>RuS<sub>x</sub>/S-GO</b>               | 1.0 M KOH          | 58                                     | 56                                               | 1.0                                     | 13          |

---

|                                  |           |    |    |     |    |
|----------------------------------|-----------|----|----|-----|----|
| <b>Ru<sub>0.33</sub>Se @ TNA</b> | 1.0 M KOH | 57 | 50 | 0.2 | 14 |
|----------------------------------|-----------|----|----|-----|----|

---

Table S4. The calculation of the atomic ratio of Ru 3p to N 1s of Ru/H-S, N-C before and after the stability test.

| <b>Sample</b>            | <b>Element</b> | <b>Peak Area</b> | <b>Sensitivity<br/>Factor</b> | <b>Normalized<br/>Area</b> | <b>Atomic<br/>Ratio</b> |
|--------------------------|----------------|------------------|-------------------------------|----------------------------|-------------------------|
| Before<br>stability test | Ru 3p          | 16007.3          | 13.262                        | 1207.0                     | 0.302                   |
|                          | N 1s           | 6693.6           | 1.676                         | 3993.8                     |                         |
| After<br>stability test  | Ru 3p          | 7693.1           | 13.262                        | 580.1                      | 0.305                   |
|                          | N 1s           | 3190.6           | 1.676                         | 1903.7                     |                         |

## Reference:

1. E. Demir, S. Akbayrak, A. M. Onal and S. Ozkar, *ACS Appl. Mater. Interfaces*, 2018, **10**, 6299-6308.
2. P. Jiang, Y. Yang, R. Shi, G. Xia, J. Chen, J. Su and Q. Chen, *J. Mater. Chem. A*, 2017, **5**, 5475-5485.
3. D. Yoon, J. Lee, B. Seo, B. Kim, H. Baik, S. H. Joo and K. Lee, *Small*, 2017, **13**, 1700052.
4. C. Zhong, Q. Zhou, S. Li, L. Cao, J. Li, Z. Shen, H. Ma, J. Liu, M. Lu and H. Zhang, *J. Mater. Chem. A*, 2019, **7**, 2344-2350.
5. Z. Pu, I. S. Amiinu, Z. Kou, W. Li and S. Mu, *Angew. Chem. Int. Ed.*, 2017, **56**, 11559-11564.
6. J. Su, Y. Yang, G. Xia, J. Chen, P. Jiang and Q. Chen, *Nat. Commun.*, 2017, **8**, 14969.
7. J. Mahmood, F. Li, S. M. Jung, M. S. Okyay, I. Ahmad, S. J. Kim, N. Park, H. Y. Jeong and J. B. Baek, *Nat. Nanotechnol.*, 2017, **12**, 441-446.
8. Y. Liu, Y. Yang, Z. Peng, Z. Liu, Z. Chen, L. Shang, S. Lu and T. Zhang, *Nano Energy*, 2019, **65**, 104023.
9. T. Liu, B. Feng, X. Wu, Y. Niu, W. Hu and C. M. Li, *ACS Appl. Energy Mater.*, 2018, **1**, 3143-3150.
10. Q. Liu, L. Wang, X. Liu, P. Yu, C. Tian and H. Fu, *Sci. China Mater.*, 2018, **62**, 624-632.
11. J. Zhang, X. Xu, L. Yang, D. Cheng and D. Cao, *Small Methods*, 2019, **3**, 1900653.
12. X. Zhang, F. Zhou, S. Zhang, Y. Liang and R. Wang, *Adv. Sci.*, 2019, **6**, 1900090.
13. W. Fang, H. Hu, T. Jiang, G. Li and M. Wu, *Carbon*, 2019, **146**, 476-485.
14. K. Wang, Q. Chen, Y. Hu, W. Wei, S. Wang, Q. Shen and P. Qu, *Small*, 2018, **14**, e1802132.
